# Supplementary material for: The Pel Polysaccharide Can Serve a Structural and Protective Role in the Biofilm Matrix of Pseudomonas aeruginosa
Source: PLoS Pathog. 2011 Jan 27;7(1):e1001264. doi: 10.1371/journal.ppat.1001264 (PMC3029257; doi:10.1371/journal.ppat.1001264)
Supplement: Table S1 — A list of primers, plasmids and bacterial strains used in the study. (0.05 MB XLS) [file ppat.1001264.s010.xls]

## Sheet: Sheet1
Table S1. Primers, strains and plasmids used in this study
RT-PCR primers
AmpR-F	GCGCCATCCCTTCATCG
AmpR-R	GATGTCGACGCGGTTGTTG
PelA-F	CCTTCAGCCATCCGTTCTTCT
PelA-A	TCGCGTACGAAGTCGACCTT
PslA-F	AAGATCAAGAAACGCGTGGAAT
PslA-R	TGTAGAGGTCGAACCACACCG
SadC-F	GCTATGGATCAGGTCGTCTTG
SadC-R	CCGAATTACCCGCCTGAAG
LasR-F	TTTCTGGGAACCGTCCATCT
LasR-R	GCCGAGGCTTCCTCGAA
Deletion Constructs
PelB upstream-F	GCCTGGAAGGCCTGCATCGCGCCAG
PelB upstream-R	GCCGCGTTCAGGGCATGAATACTTCTTCGC
PelB downstream-F	ATTCATGCCCTGAACGCGGCCCGGATACG
PelB downstream-R	ACGCCGGCTCCAGCACCTGCAGGCT
Over-expression constructs
PAO1PBADpel
PAO1 upstream F	TTAAGCTTGGTTGCGGACCGCGCTCTTGCC
PAO1 upstream R	GGAGCTCCAGCCCATGCTTCCGACCTGCCGC
pJN105 araC-PBAD promoter F	TATGAAAAGTGCTGGAGCTCCACCGCGGTGG
pJN105 araC-PBAD promoter R	GGAAGCATGGGCTGGAGCTCCACCGCGGTGG
PAO1 downstream F	GCAGAATCCCGTGGCAAAGTGGAAAGCCCA
PAO1 downstream R	GGAAGCTTCCGCTCTACCGCATGTTCTATTGG
PA14 PBADpel
PA14 upstream F	TTTTTAAGCTTCATCGAGGCGTCCGACGTGACC
PA14 upstream R	TAGGGTTTGCCGTCATCGGAAAACTCACC
pJN105 araC-PBAD promoter F	TTCCGATGACGGCAAACCCTATGCTACTCCG
pJN105 araC-PBAD promoter R	GTTTCCGATGGAACTAGTGGATCCCCCGGG
PA14 downstream F	CCACTAGTTCCATCGGAAACCGCATCCATGC
PA14 downstream R	TTTTAAAGCTTCCCTTCAGCCAATCGCGATCG
BL21 pET20b(+) PelF
PelF NdeI F	TTTTCATATGACCGAACACACCGCTCC
PelF XhoI R	TTTCTCGAGTGCAATCTCCGTGGCTTCG
pMJT-1 Ppel
pel operon SpeI F	TTACTAGTATGCGGTTCAGCAAGAAAGGAATCGCCG
pel operon SpeI R	TTACTAGTCAGCGATTGAGCATGAAGGTCTCG
Strains		Reference
PAO1	wild-type	38
PAO1DpelB	pelB nonpolar mutant of PAO1	This study
PAO1PBADpel	chromosomal replacement of the native promoter with araC-PBAD promoter	This study
PAO1 pMRP9-1	harbors a gfp expressing plasmid	This study
PAO1DpelB pMRP9-1	harbors a gfp expressing plasmid	This study
PAO1PBADpel pMRP9-1	harbors a gfp expressing plasmid	This study
PA14	wild-type	39
PA14DpelB	pelB nonpolar mutant of PAO1	This study
PA14PBADpel	chromosomal replacement of the native promoter with araC-PBAD promoter	This study
PA14 miniTn7 gfp	Tn7 chromosomal insertion of gfp	This study
PA14DpelB miniTn7 gfp	Tn7 chromosomal insertion of gfp	This study
PA14 PBADpel miniTn7 gfp	Tn7 chromosomal insertion of gfp	This study
BL21	E. coli expression strain	Novagen
BL21 pET20b(+) PelF	C-term His-tag PelF expression strain	This study
Plasmids
pEX18Gm	Suicide cloning vector, gentamicin resistance	41
pEX18Gm:: DpelB	pelB replacement vector	This study
pEX18Gm:: PBADDPpelA-1	PAO1 pelA promoter replacement vector for araC-PBAD promoter	This study
pEX18Gm::PBADPpelA-2	PA14 pelA promoter replacement vector for araC-PBAD promoter	This study
pMRP9-1	GFP-expressing plasmid under control of the Tac promoter, carbenicillin resistance	42
miniTn7(Gm)PrrnB P1 gfp-a	mini-Tn7 transposon with GFP	43
pET20b(+)	C-term His-tag expression vector	Novagen
pET20b(+) PelF	C-term His-tag fused to PelF expression vector	This study
pMJT-1	pUCP18 expression plasmid under control of the PBAD-araC promoter, carbenicillin resistance	40
pMJT-1 Ppel	Pel operon cloned into pMJT-1	This study
